# Supplementary material for: Immune Mediator Profile in Aqueous Humor Differs in Patients with Primary Acquired Ocular Toxoplasmosis and Recurrent Acute Ocular Toxoplasmosis
Source: Hindawi journal article supplement (doi:10.1155/2019/9356728), 2019-02-17
Supplement: f1 [file 9356728.f1.zip]

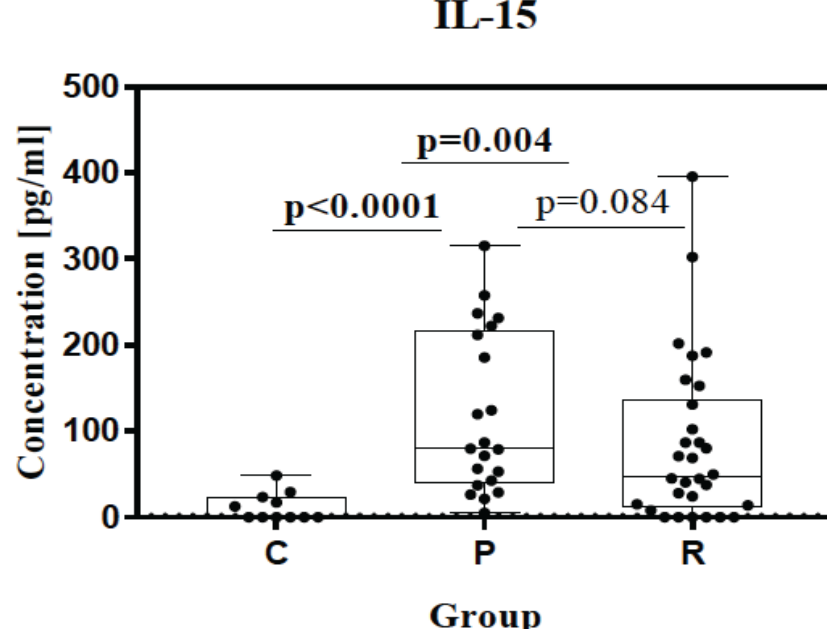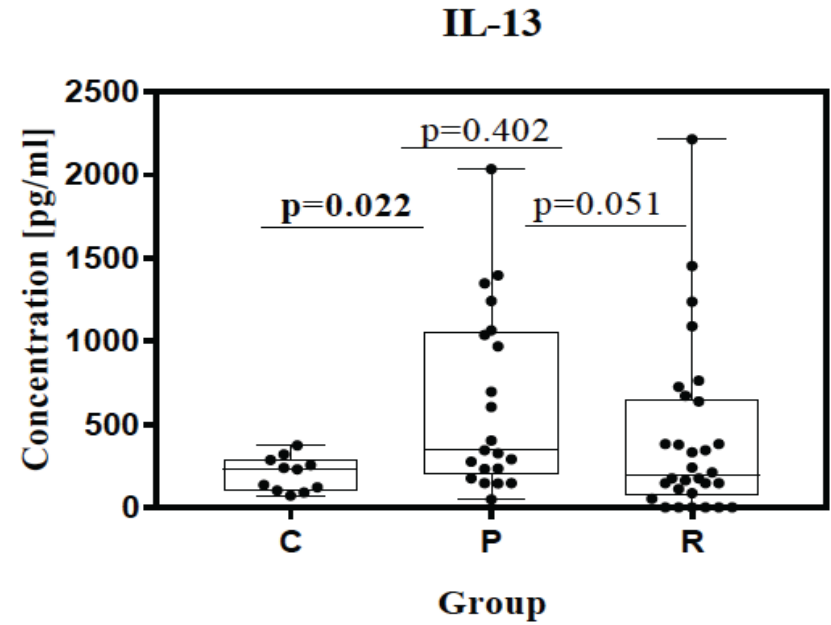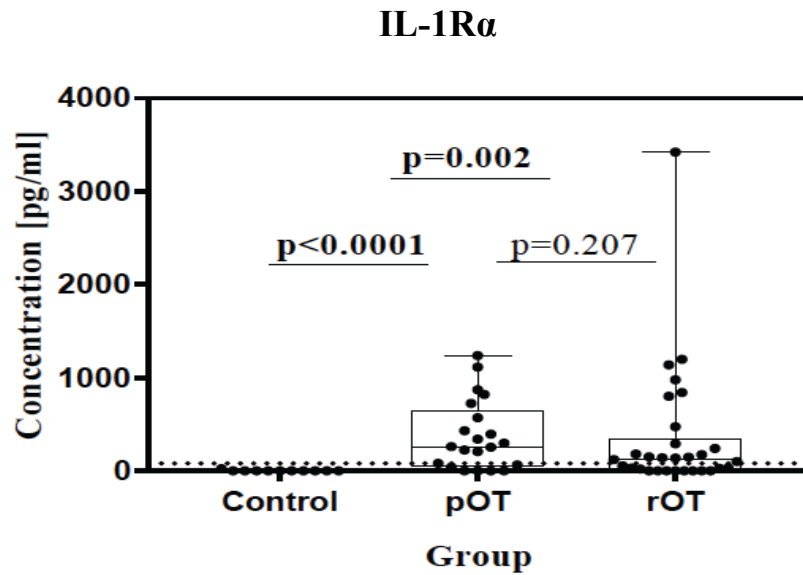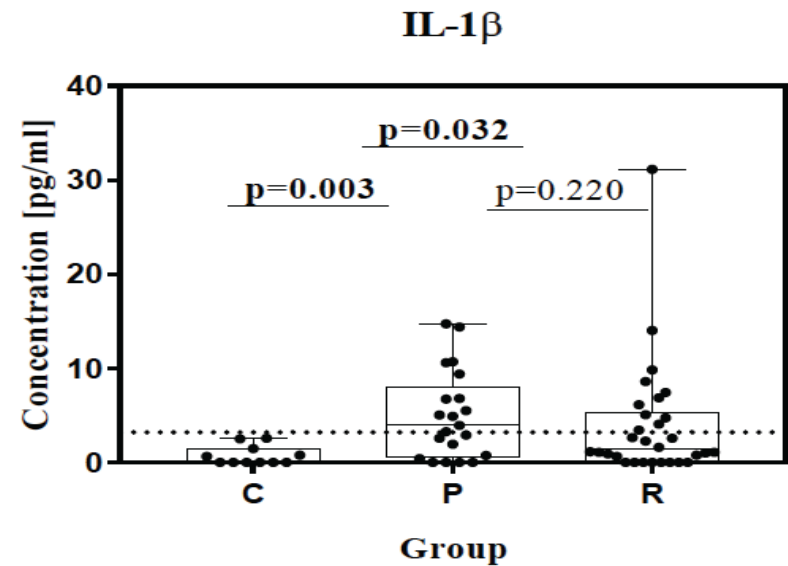

Supplementary Figure 1. Boxplots showing the concentrations of T cell development promoting cytokine IL-15, the  $T_h2$  cytokine IL-13, the  $T_h17$  cytokine IL-1R $\alpha$  and the  $T_h17$  cell development promoting cytokine IL-1 $\beta$  in aqueous humor of patients with pOT, rOT and the control group ( $n=62$ ).

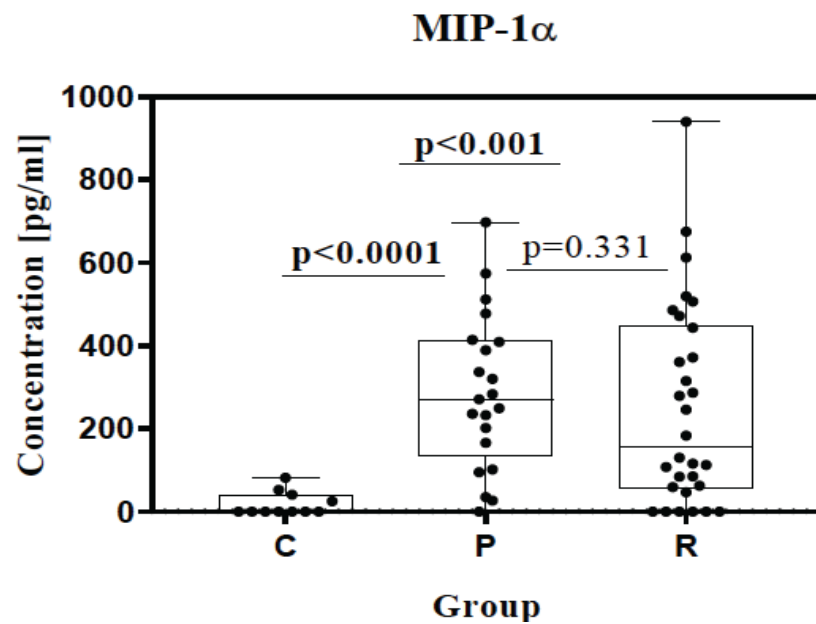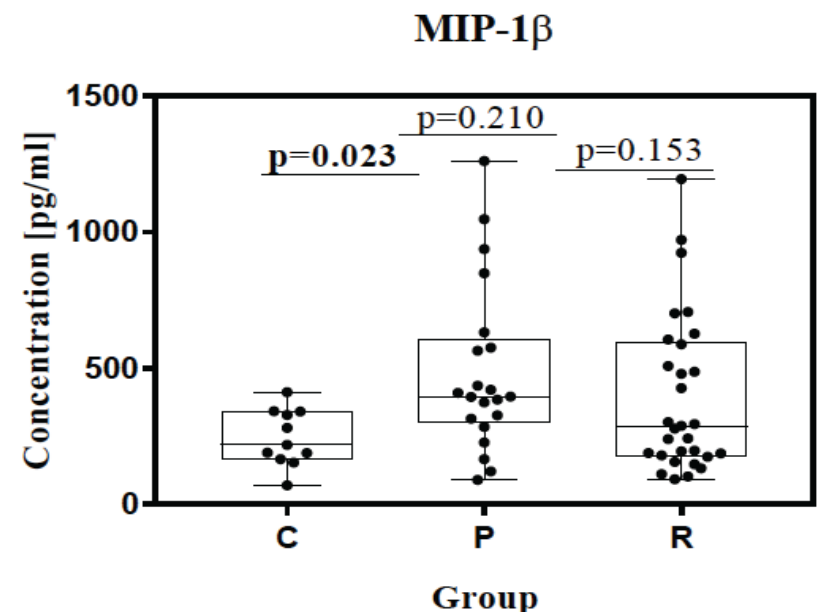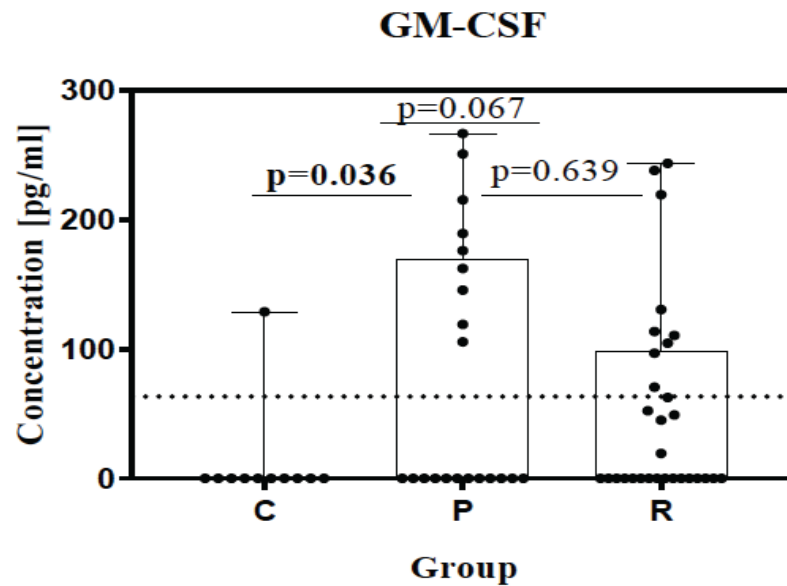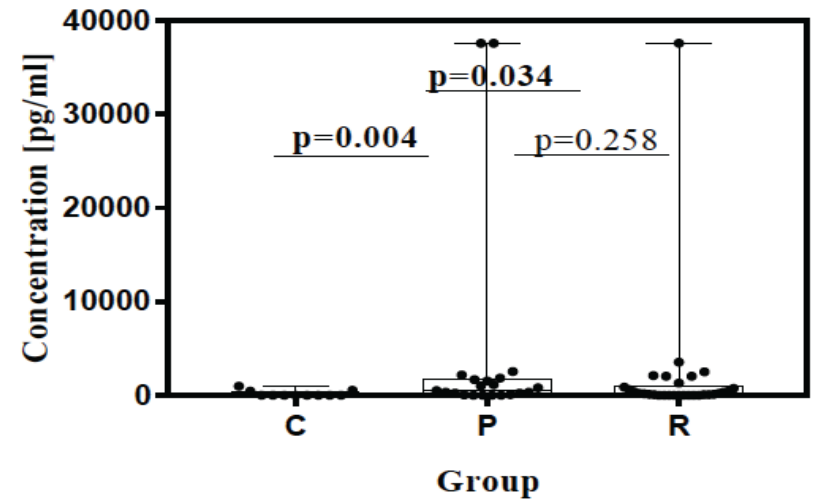

*Supplementary Figure 2. Boxplots demonstrating the concentrations of the chemokines MIP-1 $\alpha$  and MIP-1 $\beta$ , the growth factors GM-CSF and G-CSF in aqueous humor of patients with pOT, rOT and the control group (n=62).*

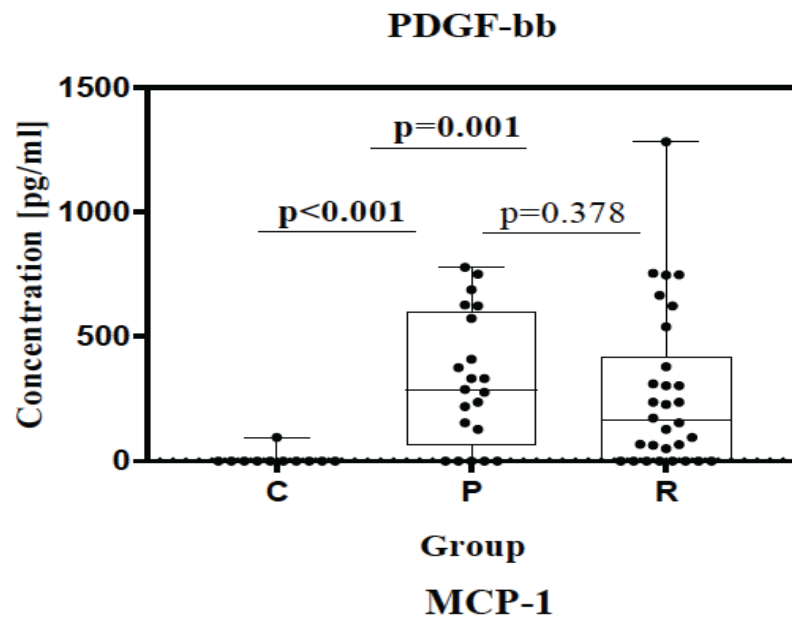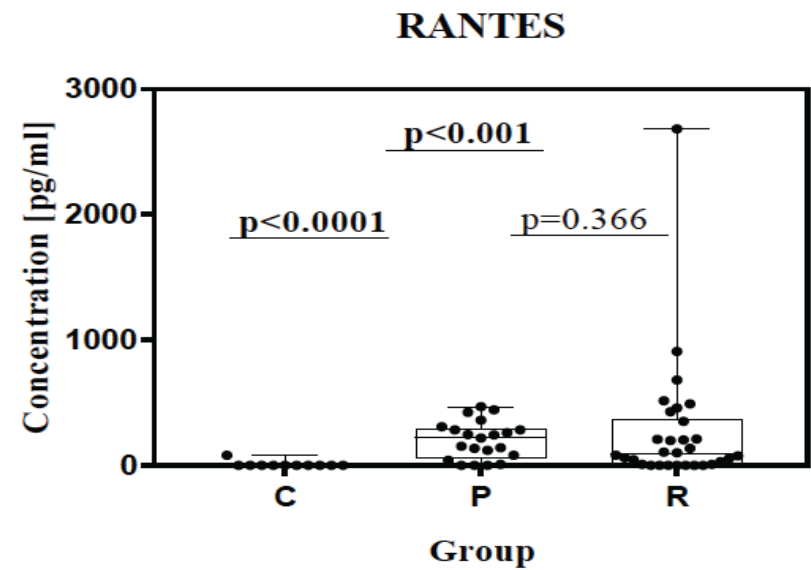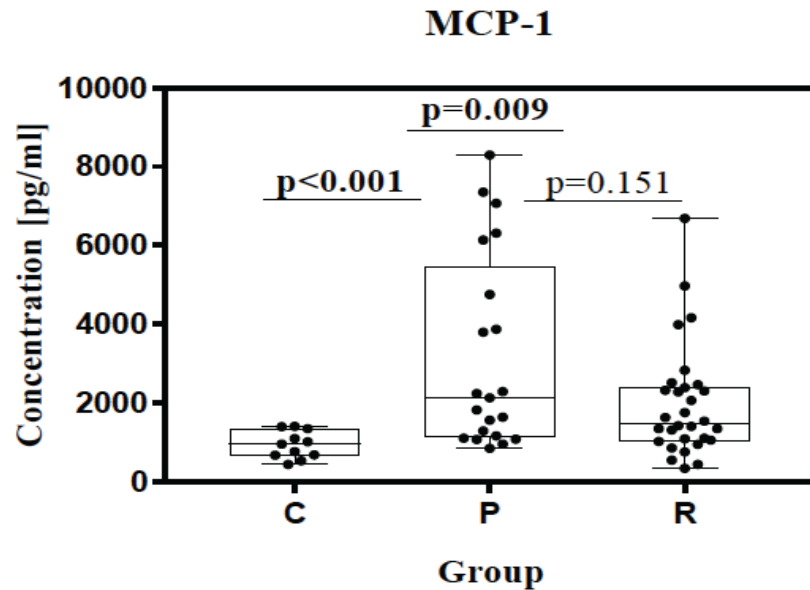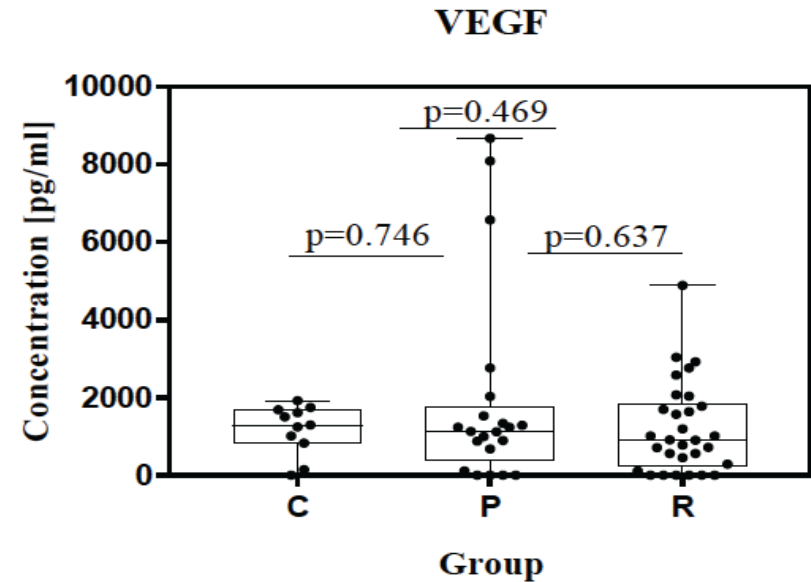

*Supplementary Figure 3. Boxplots showing the concentrations of the chemokines PDGF-bb and Rantes, the growth factor MCP-1 and angiogenetic factor VEGF in aqueous humor of patients with pOT, rOT and the control group (n=62).*
