# Supplementary material for: Immune Mediator Profile in Aqueous Humor Differs in Patients with Primary Acquired Ocular Toxoplasmosis and Recurrent Acute Ocular Toxoplasmosis
Source: Hindawi journal article supplement (doi:10.1155/2019/9356728), 2019-02-17
Supplement: f1 [file 9356728.f1.zip]

Supplementary Table 1. Correlation immune mediator concentration and number of recurrences from both cohorts pOT and rOT (n=51)

| Immune mediator | p value      |
|-----------------|--------------|
| IL-1 $\beta$    | 0.100        |
| IL-1R $\alpha$  | <b>0.045</b> |
| IL-2            | 0.159        |
| IL-4            | 0.064        |
| IL-5            | 0.096        |
| IL-6            | <b>0.045</b> |
| IL-7            | <b>0.017</b> |
| IL-8            | <b>0.047</b> |
| IL-9            | <b>0.008</b> |
| IL-10           | 0.147        |
| IL-12p70        | 0.238        |
| IL-13           | <b>0.024</b> |
| IL-15           | <b>0.042</b> |
| IL-17           | 0.188        |
| Eotaxin         | 0.092        |
| FGFbasic        | 0.079        |
| G-CSF           | 0.094        |
| GM-CSF          | 0.538        |
| IFN- $\gamma$   | <b>0.024</b> |
| IP-10           | 0.059        |
| MCP-1           | 0.102        |
| MIP-1 $\alpha$  | 0.094        |
| PDGF-bb         | 0.123        |
| MIP-1 $\beta$   | 0.109        |
| RANTES          | 0.092        |
| TNF- $\alpha$   | <b>0.019</b> |
| VEGF            | 0.616        |

<sup>a</sup>significant p-values are shown in bold
